# Supplementary material
Source: MDPI journal article supplement (https://www.mdpi.com/2297-8739/10/10/524)
Supplement: s1 [file s1]

## SUPPLEMENTARY MATERIAL

# Microwave-Assisted Semisynthesis and Leishmanicidal Activity of Some Phenolic Constituents from Lichens

Grover Castañeta <sup>1</sup>, Rodrigo Villagomez <sup>1</sup>, Efrain Salamanca <sup>2</sup>, Pamela Canaviri-Paz <sup>3</sup>, José A. Bravo <sup>1</sup>, José L. Vila <sup>1</sup>, Daniela Bárcenas-Pérez <sup>4,5</sup>, José Cheel <sup>4,\*</sup>, Beatriz Sepúlveda <sup>6</sup>, Alberto Giménez <sup>2</sup> and Carlos Areche <sup>7,\*</sup>

1 Instituto de Investigaciones Químicas IIQ, Universidad Mayor de San Andrés UMSA, Av. Villazón N° 1995, Box 303, La Paz 0201-0220, Bolivia; gcastaneta1@gmail.com (G.C.); rodrigo.villagomez.a@gmail.com (R.V.);

joseabravo@outlook.com (J.A.B.); joselu62@hotmail.com (J.L.V.)

2 Instituto de Investigaciones Fármaco Bioquímicas, Área de Química Farmacéutica, Facultad de Ciencias Farmacéuticas y Bioquímicas, Universidad Mayor de San Andrés, Av. Saavedra N° 2224, Miraflores, Box 303, La Paz 0201-0220, Bolivia; efrain\_salamanca@hotmail.com (E.S.); ajgimenez@umsa.bo (A.G.)

3 Department of Food Technology, Engineering and Nutrition, Faculty of Engineering, Lund University, Box 117, SE-221 00 Lund, Sweden; pcanaviripaz41@gmail.com

4 Laboratory of Algal Biotechnology-Centre ALGATECH, Institute of Microbiology of the Czech Academy of Sciences, Opatovický Mlyn, 37981 Trebon, Czech Republic; barcenass@alga.cz

5 Faculty of Science, University of South Bohemia, Branišovská 1760, 37005 České Budějovice, Czech Republic

6 Departamento de Ciencias Químicas, Campus Viña del Mar, Universidad Andres Bello, Quillota 980,

Viña del Mar 2520000, Chile; bsepulveda@uc.cl

7 Departamento de Química, Facultad de Ciencias, Universidad de Chile, Box 653, Las Palmeras 3425, Ñuñoa, Santiago 8320000, Chile

\* Correspondence: jcheel@alga.cz (J.C.); areche@uchile.cl (C.A.); Tel.: +56-229-787-259 (C.A.)

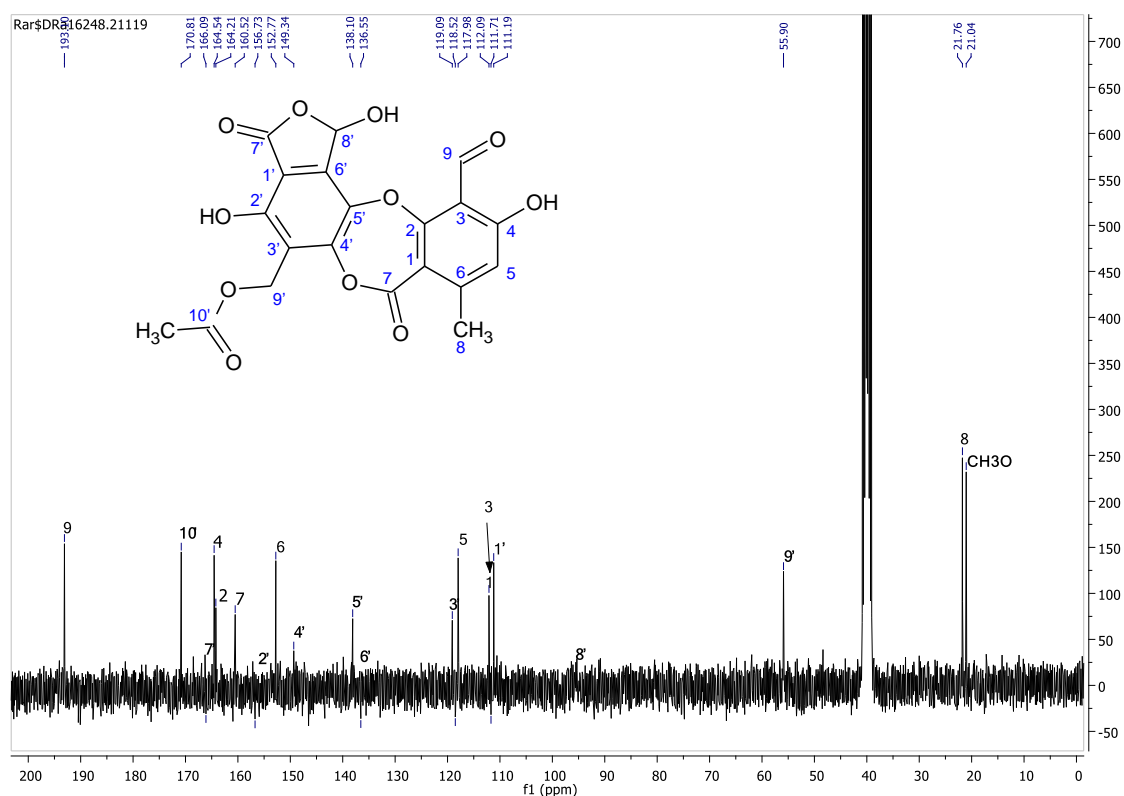

**Figure S1.**  $^{13}\text{C}$ -NMR (DMSO- $d_6$ , 75 MHz) spectrum of galbinic acid (**5**)

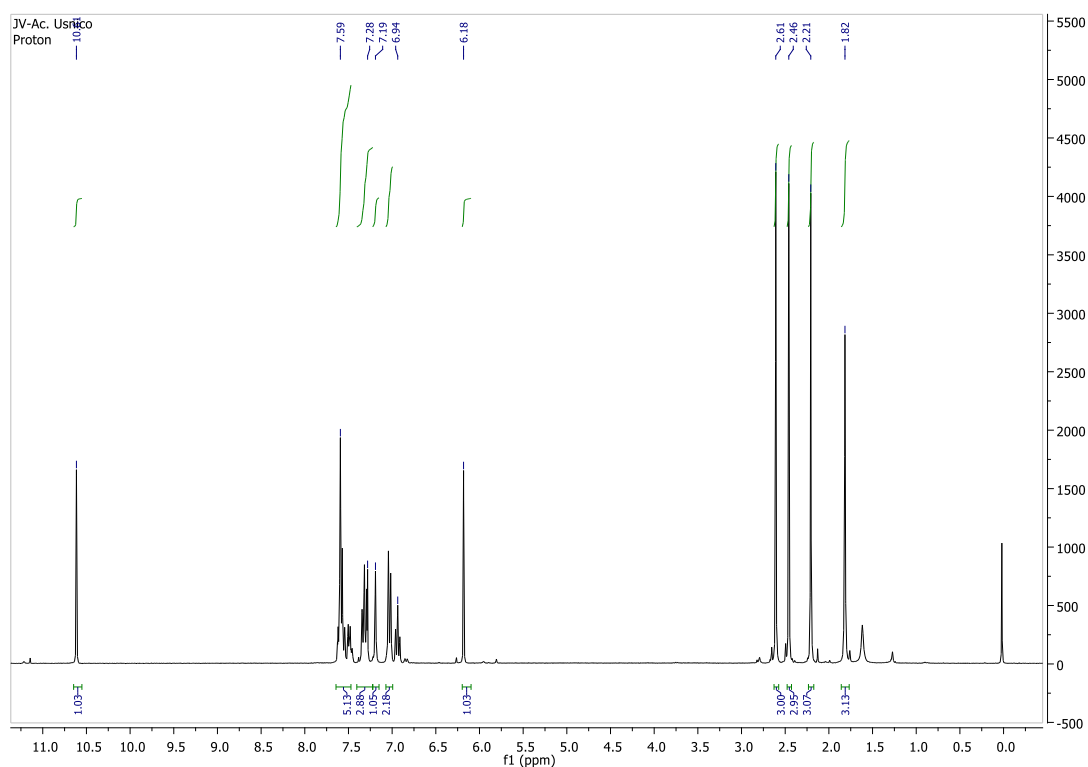

**Figure S2.**  $^1\text{H}$ -NMR ( $\text{CDCl}_3$ , 300 MHz) spectrum of compound (**7**)

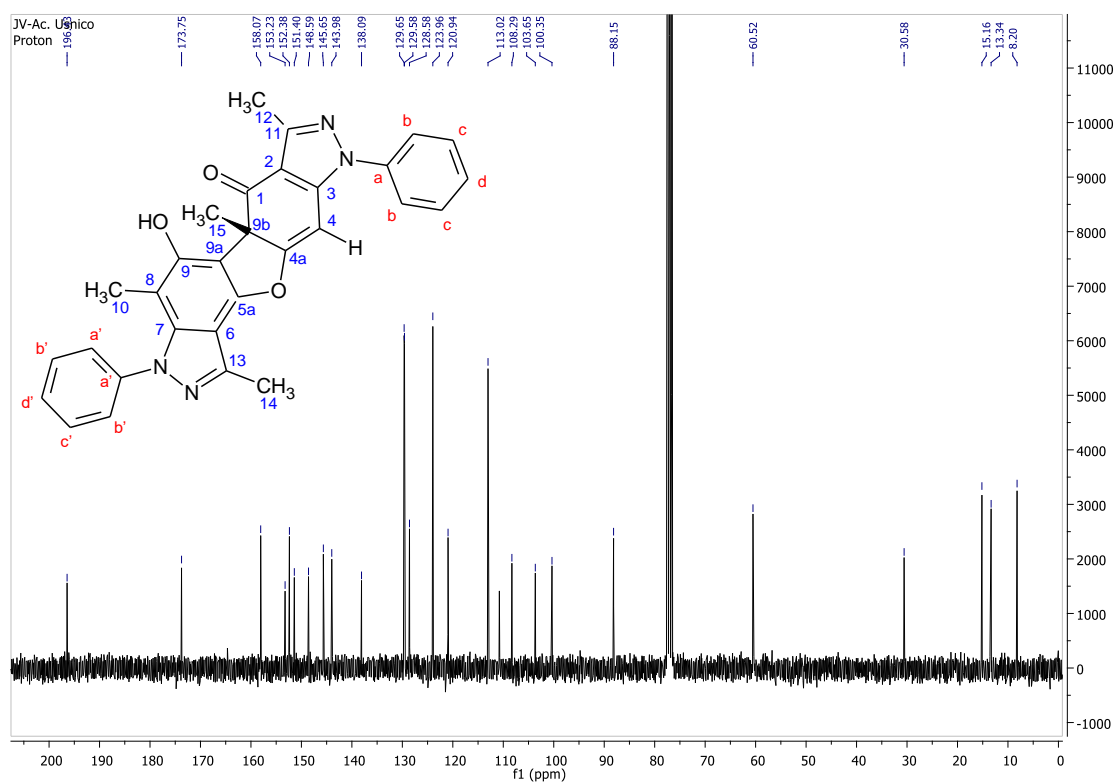

Figure S3.  $^{13}\text{C}$ -NMR ( $\text{CDCl}_3$ , 75 MHz) spectrum of compound (7)

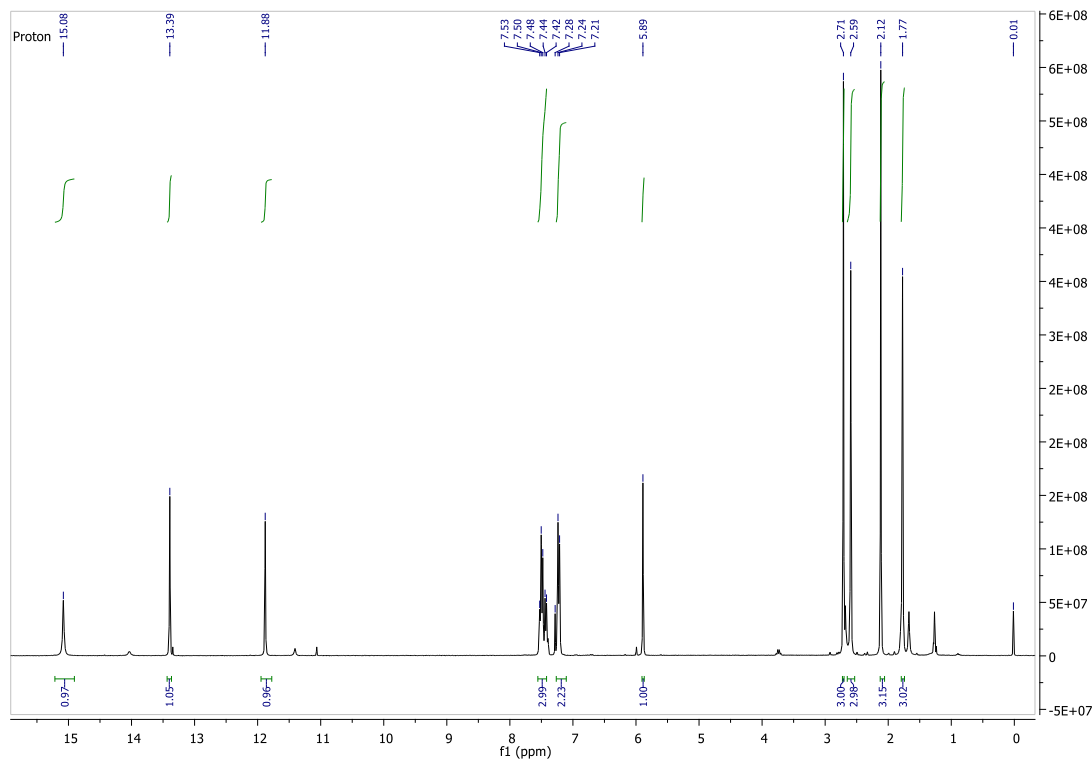

Figure S4.  $^1\text{H}$ -NMR ( $\text{CDCl}_3$ , 300 MHz) spectrum of compound (8)

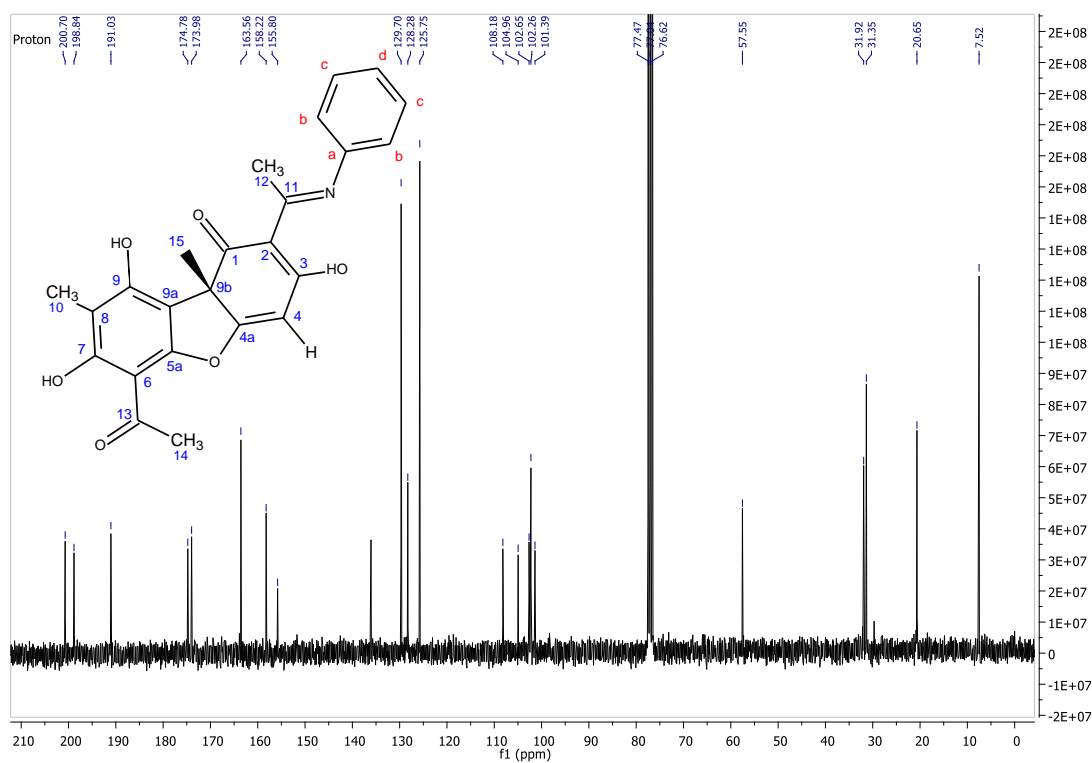

**Figure S5.**  $^{13}\text{C}$ -NMR ( $\text{CDCl}_3$ , 75 MHz) spectrum of compound (8)

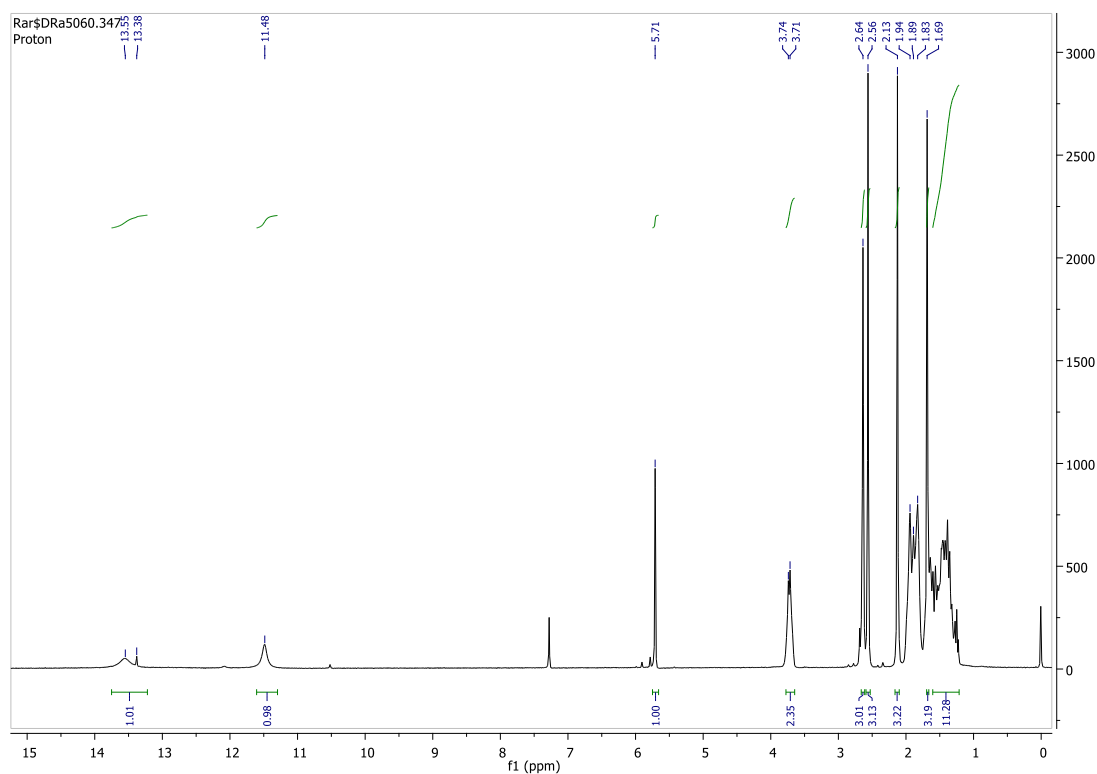

**Figure S6.**  $^1\text{H}$ -NMR ( $\text{CDCl}_3$ , 300 MHz) spectrum of compound (9)

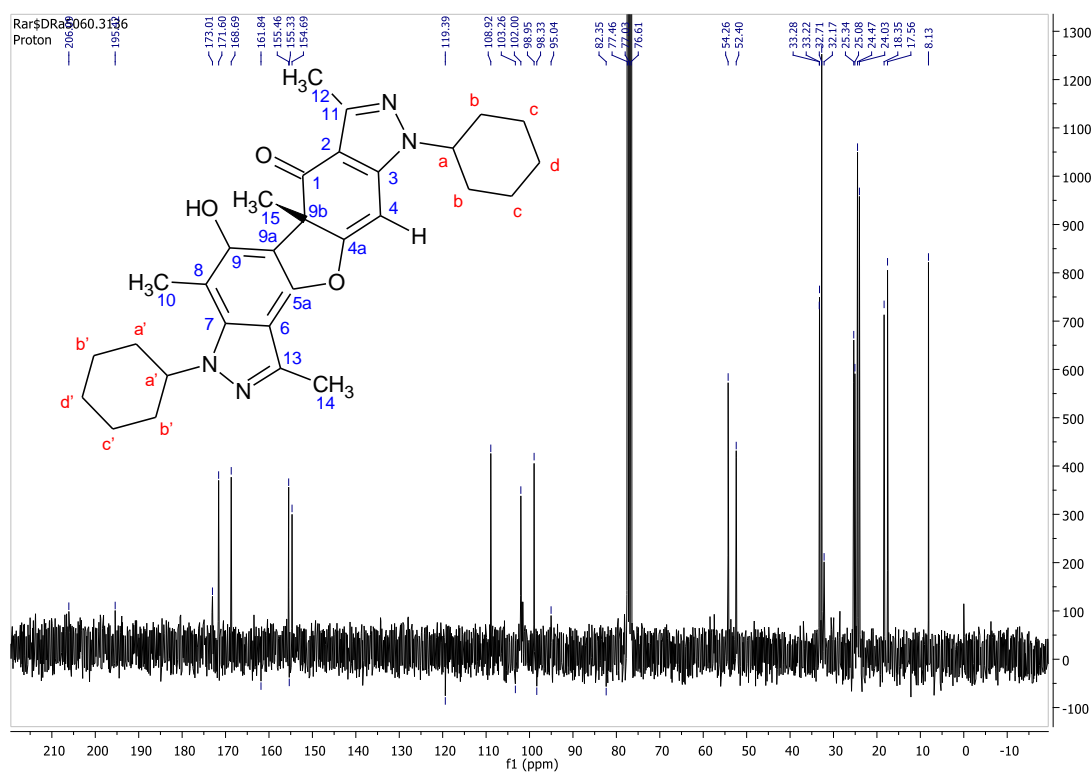

**Figure S7.**  $^{13}\text{C}$ -NMR ( $\text{CDCl}_3$ , 75 MHz) spectrum of compound (9)

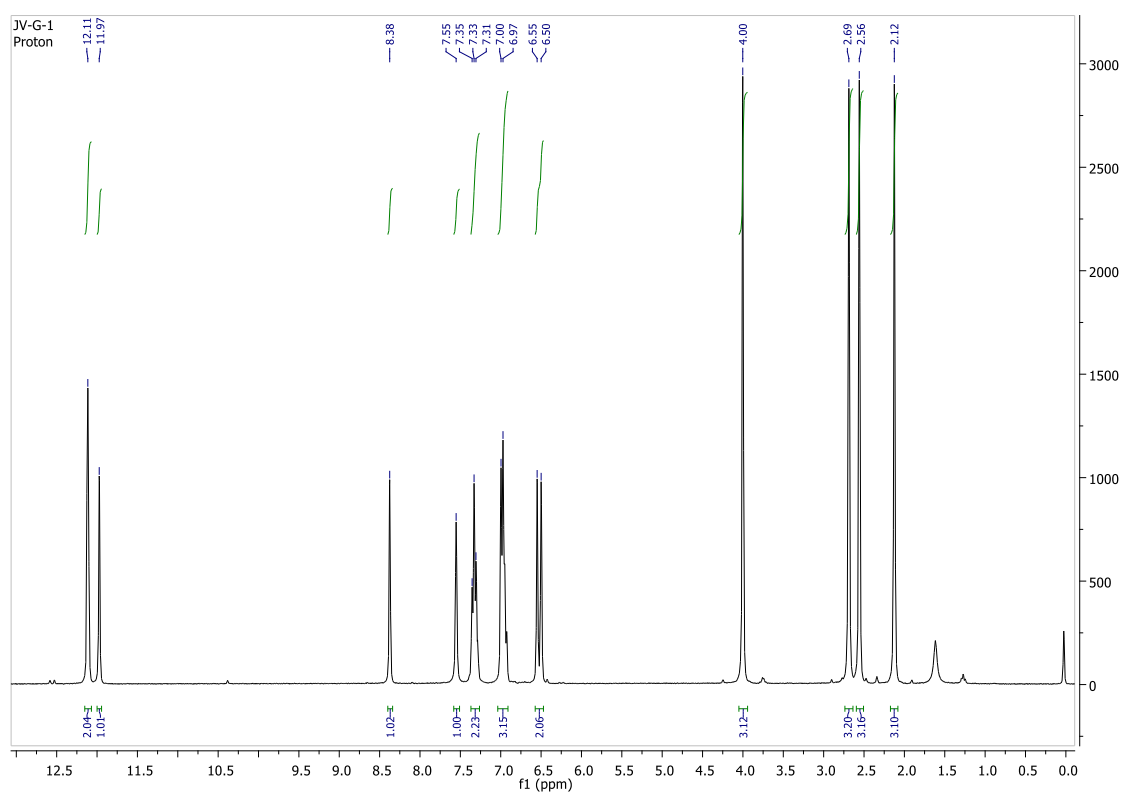

**Figure S8.**  $^1\text{H}$ -NMR ( $\text{CDCl}_3$ , 300 MHz) spectrum of compound (10)

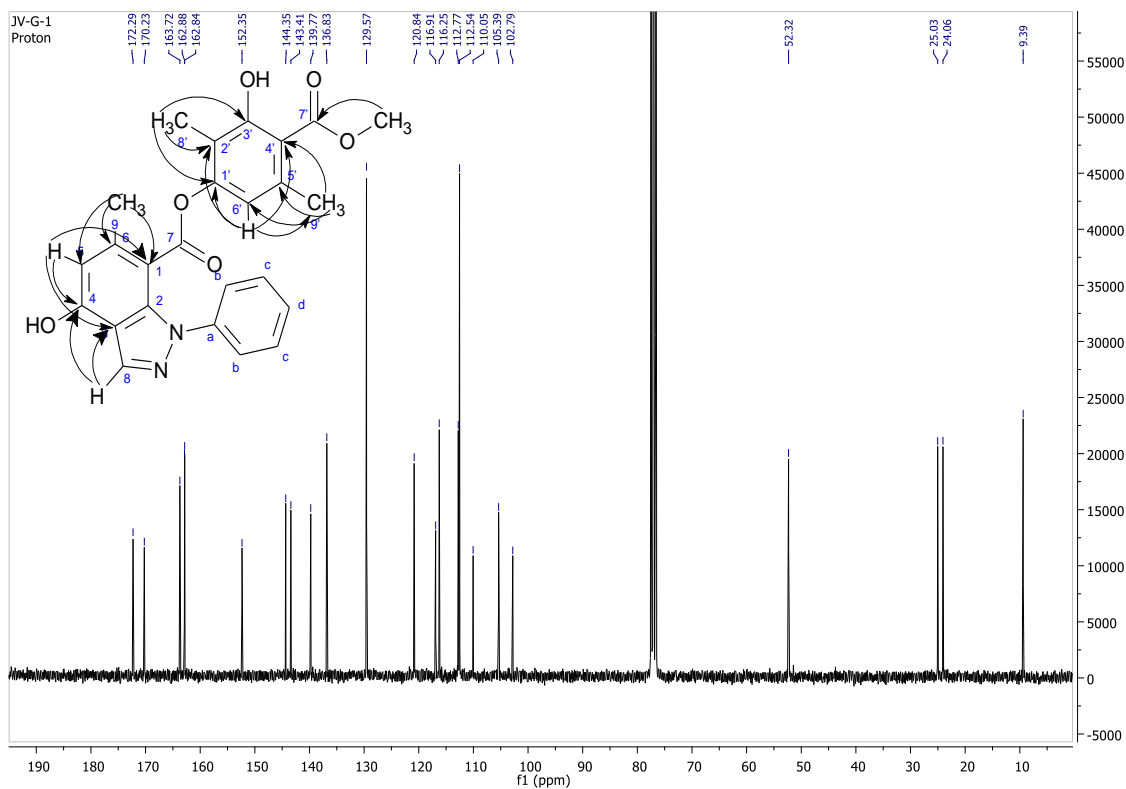

**Figure S9.**  $^{13}\text{C}$ -NMR ( $\text{CDCl}_3$ , 75 MHz) spectrum of compound (10)

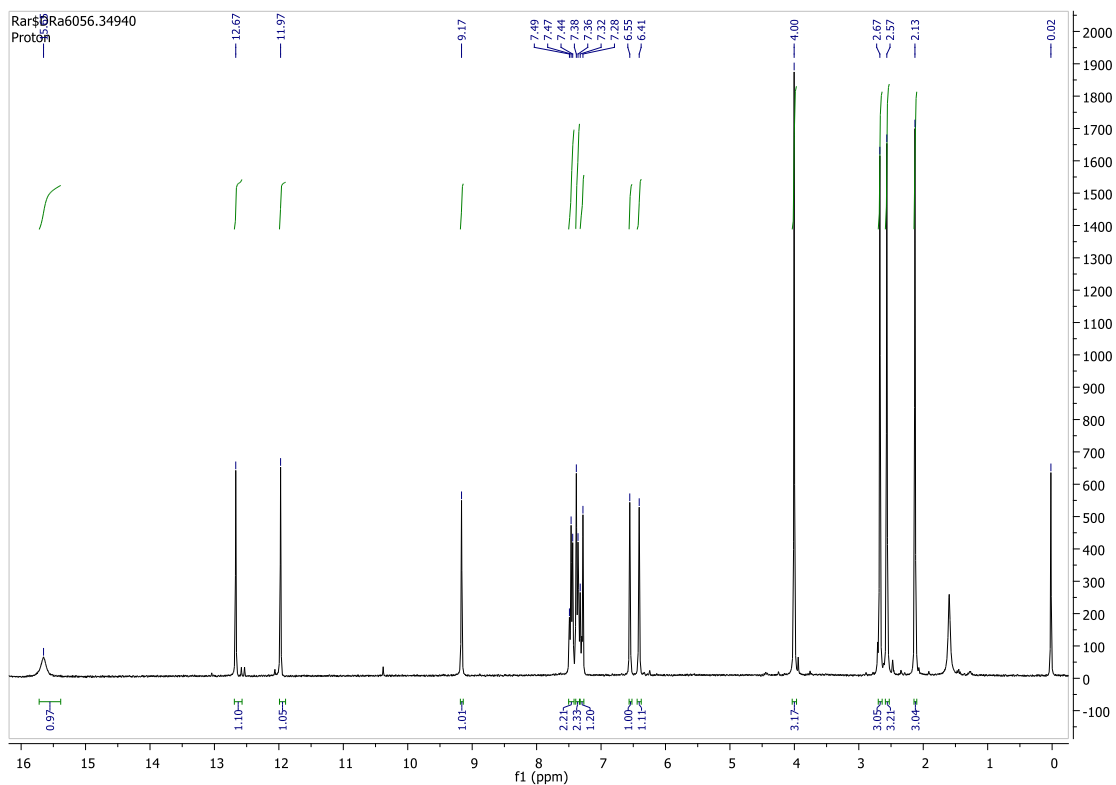

**Figure S10.**  $^1\text{H}$ -NMR ( $\text{CDCl}_3$ , 300 MHz) spectrum of compound (11)

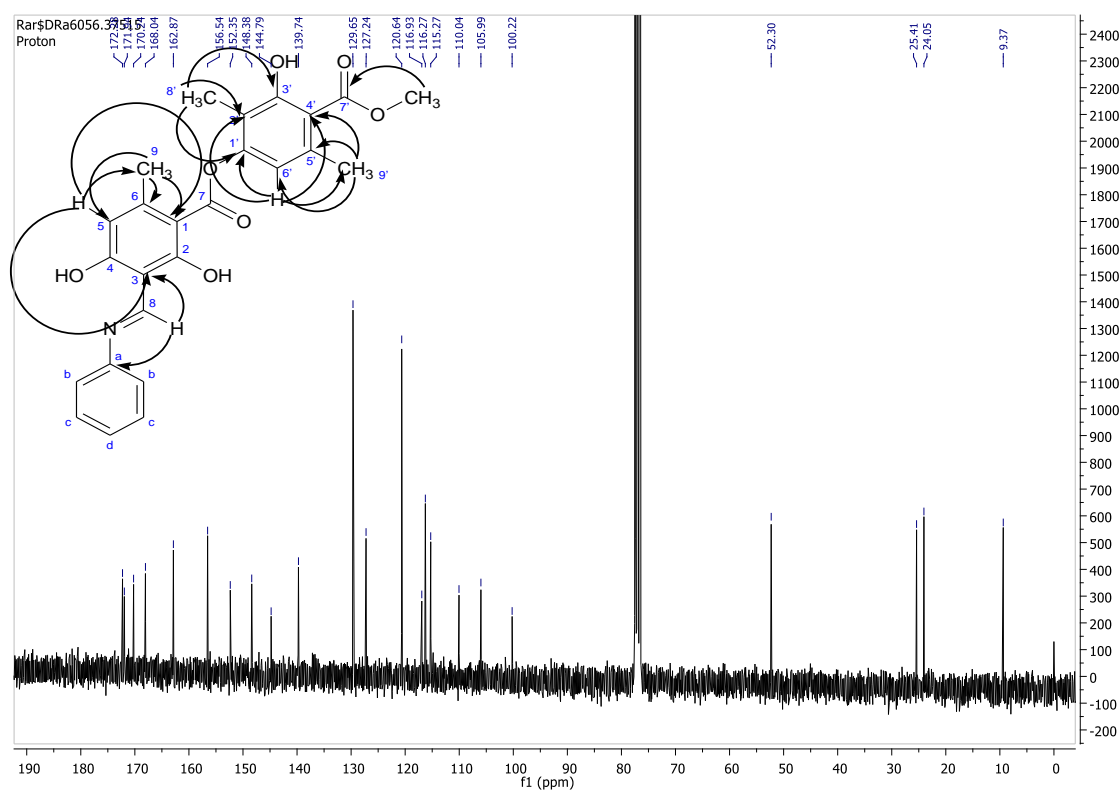

Figure S11.  $^{13}\text{C}$ -NMR ( $\text{CDCl}_3$ , 75 MHz) spectrum of compound (11)

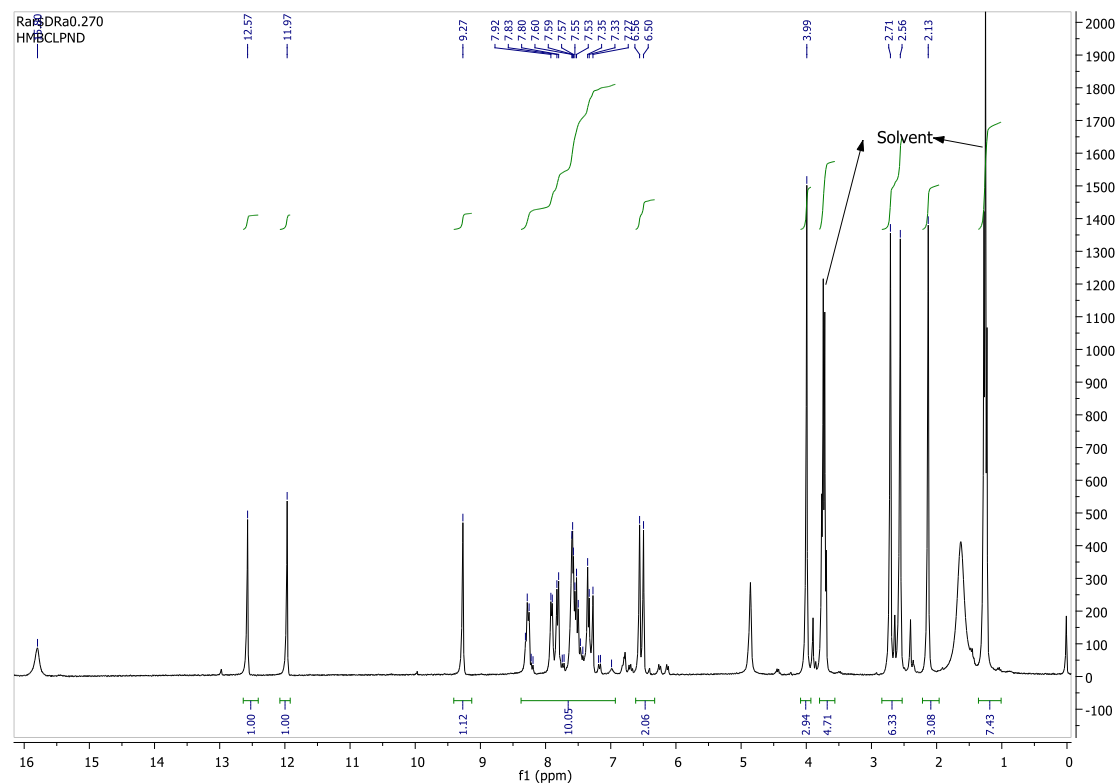

Figure S12.  $^1\text{H}$ -NMR ( $\text{CDCl}_3$ , 300 MHz) spectrum of compound (12)

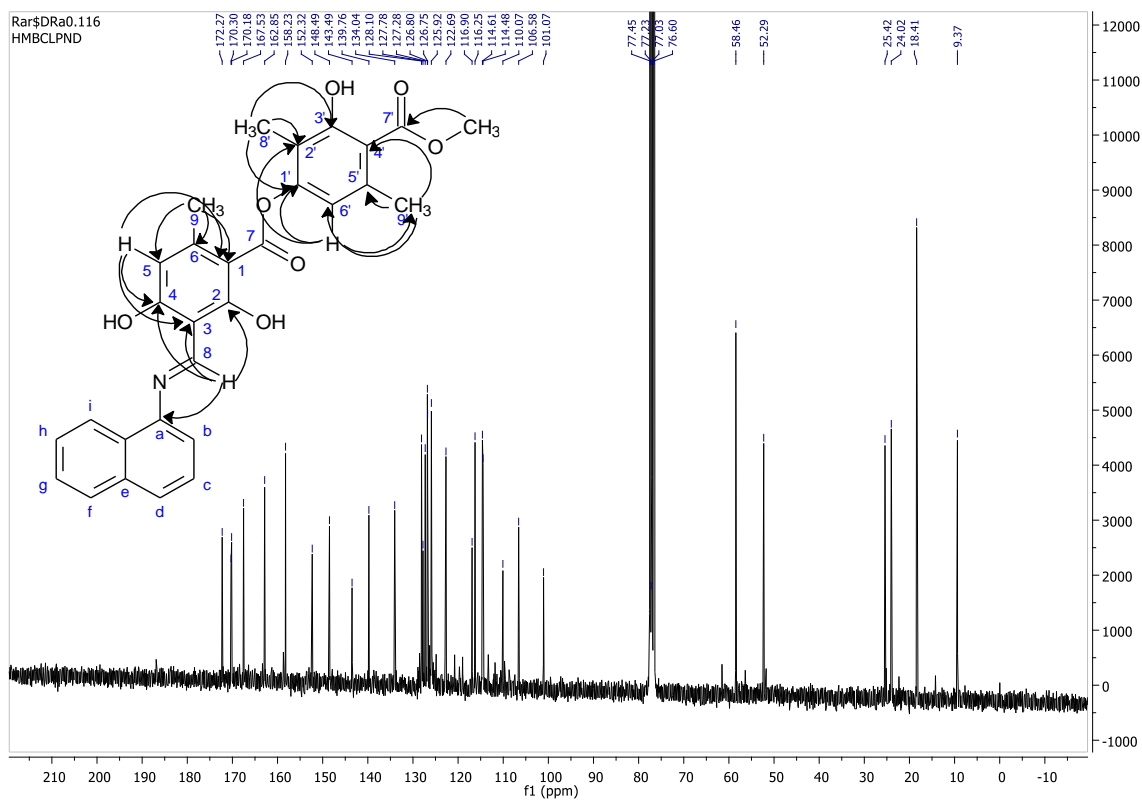

**Figure S13.**  $^{13}\text{C}$ -NMR (CDCl<sub>3</sub>, 75 MHz) spectrum of compound (12)

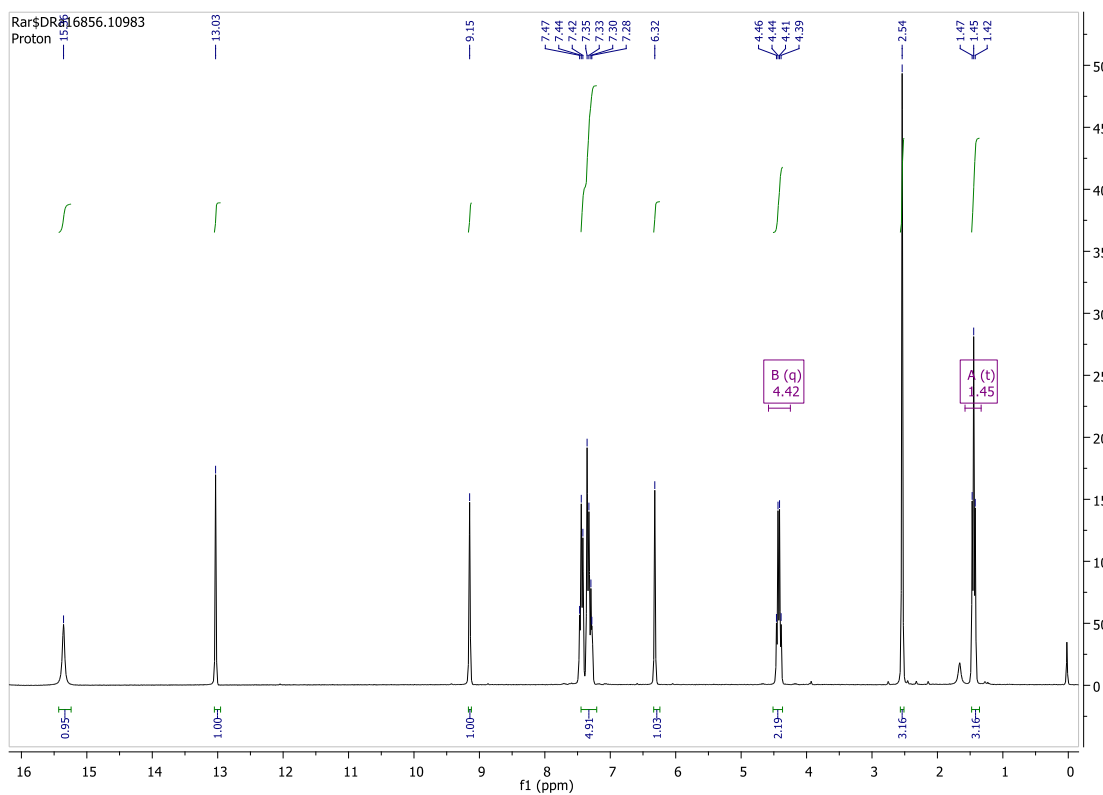

**Figure S14.**  $^1\text{H}$ -NMR (CDCl<sub>3</sub>, 300 MHz) spectrum of compound (13)



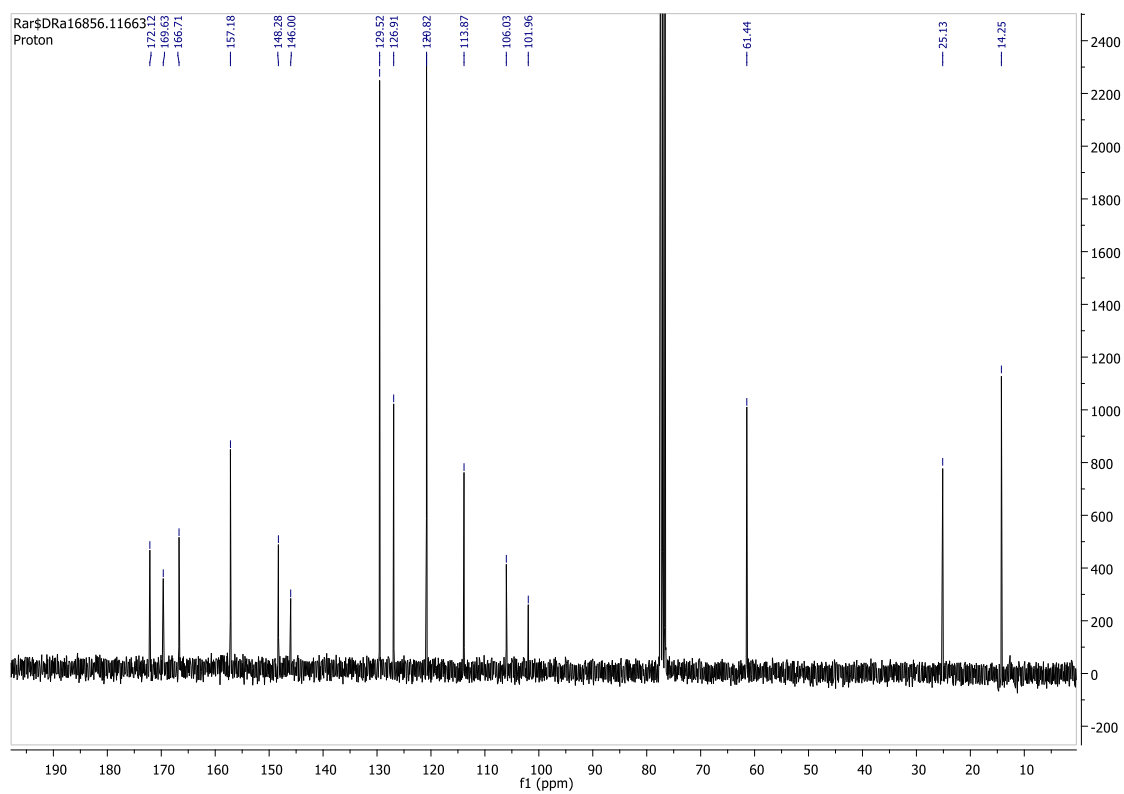

**Figure S15.**  $^{13}\text{C}$ -NMR ( $\text{CDCl}_3$ , 75 MHz) spectrum of compound (**13**)
